# Supplementary material for: VEGF-A isoforms differentially regulate ATF-2–dependent VCAM-1 gene expression and endothelial–leukocyte interactions
Source: PubMed Central journal article supplement — Mol Biol Cell. 2014 Aug 15;25(16):2509–21. doi: 10.1091/mbc.E14-05-0962 (PMC4142621; doi:10.1091/mbc.e14-05-0962), 2014-08-15

# Supplemental Materials

*Molecular Biology of the Cell*

Fearnley et al.

## SUPPLEMENTARY FIGURE LEGENDS

SUPPLEMENTARY FIGURE S1: Statistical analysis of VEGF-A isoform-specific signal transduction events. Ligand-stimulated endothelial cells were subjected to immunoblotting to monitor levels of (A, B) VEGFR2-pY1175, (C, D) ERK1/2-pT202/pY204, (E, F) p38-pT180/pY182 or (G, H) Akt-pS473 levels upon (A, C, E, G) VEGF-A<sub>165</sub> or (B, D, F, H) VEGF-A<sub>121</sub> titration. Error bars indicate  $\pm$ SEM (n $\geq$ 4).  $p < 0.05$  (\*),  $p < 0.01$  (\*\*),  $p < 0.005$  (\*\*\*),  $p < 0.0001$  (\*\*\*\*).

SUPPLEMENTARY FIGURE S2. NRP1 is required for ERK1/2-dependent ATF-2 phosphorylation. (A) NRP1 depletion in endothelial cells followed by 1.25 nM VEGF-A<sub>165</sub> (165) or VEGF-A<sub>121</sub> (121) stimulation as indicated. (B, C) Effects of NRP1 depletion on 1.25 nM VEGF-A<sub>165</sub> or VEGF-A<sub>121</sub>-stimulated intracellular signaling monitored by immunoblotting for (B) ATF-2-pT71 or (C) ERK1/2-pT202/pY204. Error bars indicate  $\pm$ SEM (n=3).  $p < 0.05$  (\*),  $p < 0.01$  (\*\*),  $p < 0.005$  (\*\*\*).

SUPPLEMENTARY FIGURE S3. VEGF-A isoform-specific regulation of endothelial cell outcomes. (A-D) Endothelial cells were seeded into various cellular assays and subjected to 0, 0.025, 0.25 or 1.25 nM VEGF-A<sub>165</sub> or VEGF-A<sub>121</sub> prior to assessment of endothelial cell (A-B) migration or (C-D) tubulogenesis. Error bars indicate  $\pm$ SEM (n=4). (E) *Ex vivo* angiogenesis using mouse tissues. Aortic ring slices were seeded into a collagen gel (see Materials and methods) prior to stimulation with 0, 0.025, 0.25 or 1.25 nM VEGF-A<sub>165</sub> or VEGF-A<sub>121</sub>. (F) Quantification of *ex vivo* aortic endothelial sprouting. Bar, 200  $\mu$ m, 400  $\mu$ m and 1000  $\mu$ m respectively. Error bars indicate  $\pm$ SEM (n=3).  $p < 0.05$  (\*),  $p < 0.01$  (\*\*),  $p < 0.005$  (\*\*\*),  $p < 0.0001$  (\*\*\*\*).

SUPPLEMENTARY FIGURE S4. ATF-2 is required for endothelial cell proliferation. Endothelial cells were treated with control, scrambled or ATF-2-specific siRNA duplexes and stimulated with 0.25 nM VEGF-A<sub>165</sub>, VEGF-A<sub>121</sub> and grown in full growth media. Endothelial cell proliferation was assessed using a BrdU incorporation ELISA (see Materials and methods). Error bars indicate  $\pm$ SEM (n=3).  $p < 0.05$  (\*),  $p < 0.0001$  (\*\*\*\*).

SUPPLEMENTARY FIGURE S5. VCAM-1 requirement in endothelial tubulogenesis. Endothelial cells treated with control, scrambled or VCAM-1-specific siRNA duplexes were seeded onto a bed of confluent human fibroblasts and stimulated with 0.25 nM VEGF-A<sub>165</sub> or VEGF-A<sub>121</sub> over 7 days. (A) Endothelial tubules were stained for the endothelial-specific antigen, PECAM-1 using mouse anti-PECAM-1 antibody followed by anti-mouse AlexaFluor594 conjugate (see Materials and methods). Stained cells were visualized by fluorescence microscopy. (B) Quantification of endothelial tubulogenesis. Bar, 1000  $\mu$ m. Error bars indicate  $\pm$ SEM (n=3). NS; non-significant.

Figure S1

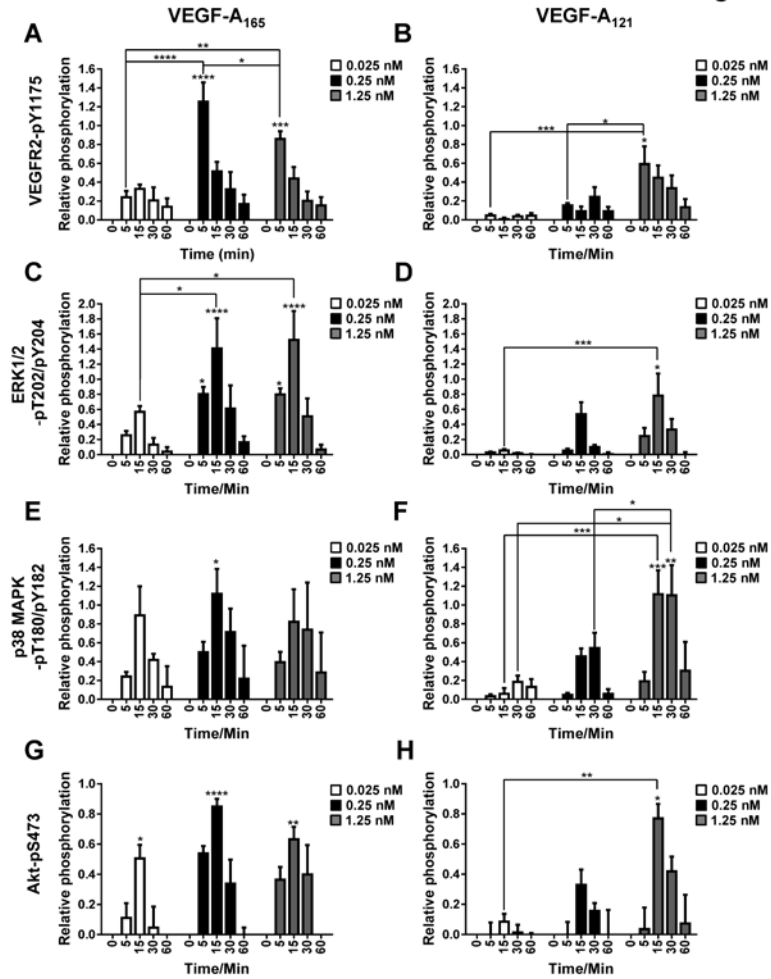

Figure S2

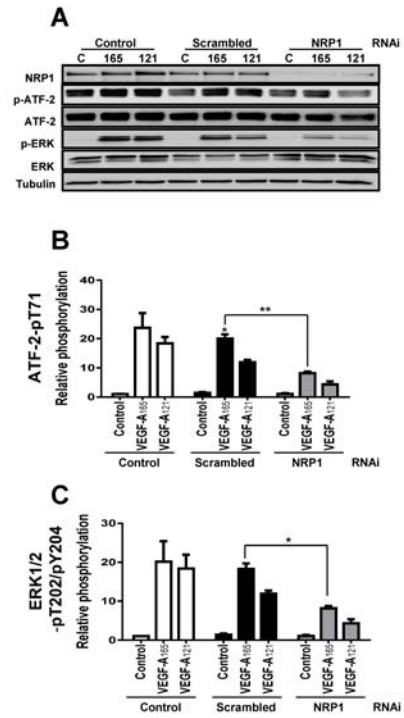

Figure S3

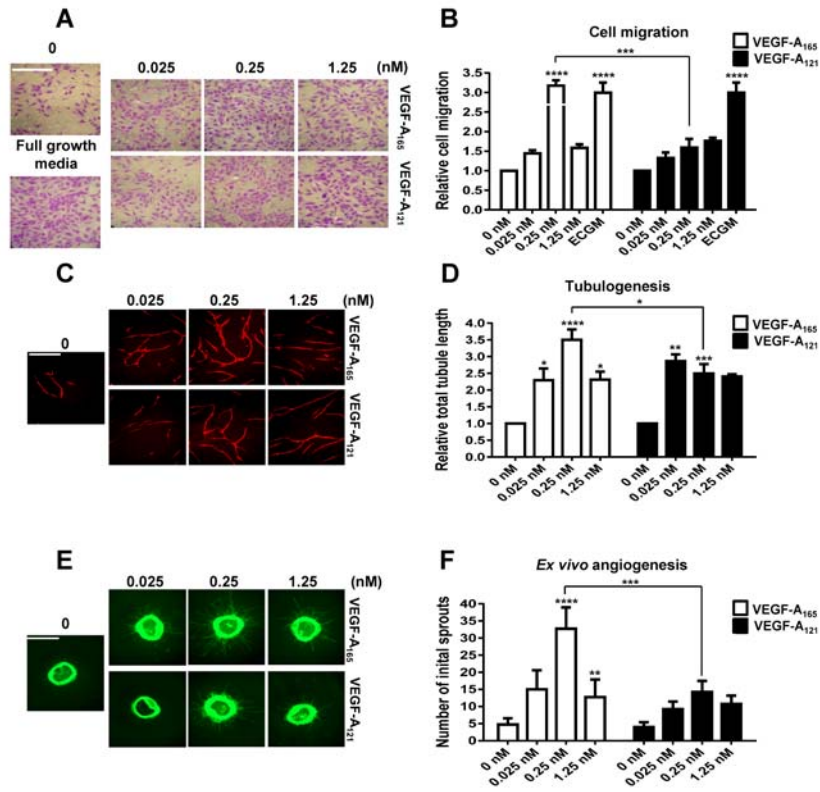

Figure S4

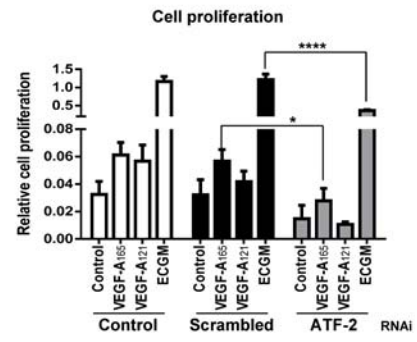

Figure S5

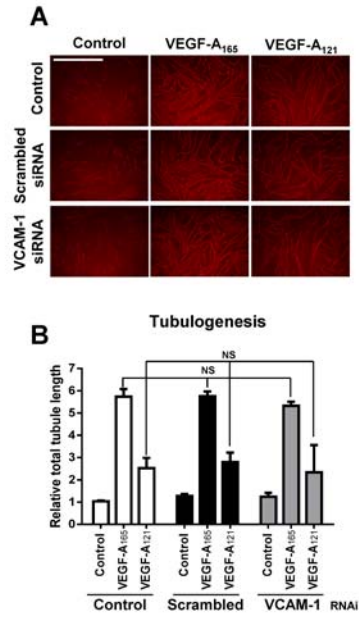

Supplement: supp_E14-05-0962v1_CombinedSupMats.pdf [file supp_E14-05-0962v1_CombinedSupMats.pdf]
